# Supplementary material
Source: Research Square preprint supplement (doi:10.21203/rs.3.rs-9145088/v1)
Supplement: Supplementary file 1 [file ee6444cb610d8f9ca1c2bb42.docx]

# STROBE checklist (combined observational studies)

Manuscript: Evaluating a stratified College English teaching reform using student-level CET-4 data: a quasi-experimental study in China

Checklist source: STROBE combined checklist for cohort, case-control, and cross-sectional studies.

| Item | STROBE recommendation | Location in manuscript | Notes |
| --- | --- | --- | --- |
| 1a | Indicate the study's design with a commonly used term in the title or the abstract. | Title and Abstract, pp. 1-2 | Reported |
| 1b | Provide in the abstract an informative and balanced summary of what was done and what was found. | Abstract, pp. 1-2 | Reported |
| 2 | Explain the scientific background and rationale for the investigation being reported. | Introduction, pp. 2-4 | Reported |
| 3 | State specific objectives, including any prespecified hypotheses. | Introduction, p. 4 | Reported |
| 4 | Present key elements of study design early in the paper. | Methods: Study design and reporting, pp. 4-5 | Reported |
| 5 | Describe the setting, locations, and relevant dates, including periods of recruitment, exposure, follow-up, and data collection. | Methods: Setting and intervention; Data sources, pp. 5-6 | Reported |
| 6a | Give the eligibility criteria, and the sources and methods of selection of participants. Describe methods of follow-up for cohort elements. | Methods: Participants, pp. 5-6 | Reported |
| 6b | For matched studies, give matching criteria and numbers of exposed and unexposed. | Not applicable | N/A |
| 7 | Clearly define all outcomes, exposures, predictors, potential confounders, and effect modifiers. Give diagnostic criteria, if applicable. | Methods: Data cleaning and variable construction; Outcomes, p. 6 | Reported |
| 8 | For each variable of interest, give sources of data and details of methods of assessment (measurement). Describe comparability of assessment methods if there is more than one group. | Methods: Data sources; Data cleaning and variable construction, pp. 5-6 | Reported |
| 9 | Describe any efforts to address potential sources of bias. | Methods: Data cleaning and variable construction; Discussion: limitations, pp. 6-7, 11-12 | Partly reported |
| 10 | Explain how the study size was arrived at. | Methods: Participants, pp. 5-6 | All eligible records and linkable placement records were included |
| 11 | Explain how quantitative variables were handled in the analyses. If applicable, describe which groupings were chosen and why. | Methods: Data cleaning and variable construction; Statistical analysis, pp. 6-7 | Reported |
| 12a | Describe all statistical methods, including those used to control for confounding. | Methods: Statistical analysis, p. 7 | Reported |
| 12b | Describe any methods used to examine subgroups and interactions. | Methods: Statistical analysis; Results: College-level heterogeneity, pp. 7-9 | Reported |
| 12c | Explain how missing data were addressed. | Not separately reported | Consider adding if required by reviewers |
| 12d | If applicable, explain how loss to follow-up was addressed. | Methods: Participants, p. 6 | Not applicable to repeated cross-sectional analysis; linkage success reported for cohort stage |
| 12e | Describe any sensitivity analyses. | Not separately reported | Consider adding if required by reviewers |
| 13a | Report numbers of individuals at each stage of study—for example, numbers potentially eligible, examined for eligibility, confirmed eligible, included in the study, completing follow-up, and analysed. | Methods: Participants, pp. 5-6; Results: Sample characteristics, pp. 8-9 | Reported |
| 13b | Give reasons for non-participation at each stage. | Methods: Data sources and Participants, pp. 5-6 | Partly reported; 2025 placement file could not be linked |
| 13c | Consider use of a flow diagram. | Not included | Optional; linkage counts reported in text |
| 14a | Give characteristics of study participants and information on exposures and potential confounders. | Results: Sample characteristics; Tables 1 and 4, pp. 8, 16-18 | Reported |
| 14b | Indicate number of participants with missing data for each variable of interest. | Not separately reported | Consider adding if required by reviewers |
| 14c | Summarise follow-up time (for cohort studies). | Methods: Data sources and Participants, pp. 5-6 | Exam cycles and first linked outcomes reported; person-time not applicable |
| 15 | Report numbers of outcome events or summary measures over time. | Results; Tables 1-4, pp. 8-9, 16-18 | Reported |
| 16a | Give unadjusted estimates and, if applicable, confounder-adjusted estimates and their precision. Make clear which confounders were adjusted for and why they were included. | Results: Institutional-level changes; College-level heterogeneity; Placement-linked cohort analysis; Tables 2-4, pp. 8-9, 17-18 | Reported |
| 16b | Report category boundaries when continuous variables were categorized. | Methods: Data cleaning and variable construction, p. 6 | Reported (pass >=425; A/B/C placement levels) |
| 16c | If relevant, consider translating estimates of relative risk into absolute risk for a meaningful time period. | Not applicable | Odds ratios and mean differences were primary effect measures |
| 17 | Report other analyses done—for example, analyses of subgroups and interactions, and sensitivity analyses. | Results: College-level heterogeneity; Placement-linked cohort analysis, pp. 8-9 | Reported for subgroup analyses; sensitivity analyses not separately reported |
| 18 | Summarise key results with reference to study objectives. | Discussion, pp. 9-10; Conclusions, p. 12 | Reported |
| 19 | Discuss limitations of the study, taking into account sources of potential bias or imprecision. | Discussion, pp. 11-12 | Reported |
| 20 | Give a cautious overall interpretation of results considering objectives, limitations, multiplicity of analyses, results from similar studies, and other relevant evidence. | Discussion, pp. 9-12 | Reported |
| 21 | Discuss the generalisability (external validity) of the study results. | Discussion, pp. 11-12 | Reported |
| 22 | Give the source of funding and the role of the funders for the present study and, if applicable, for the original study on which the present article is based. | Declarations: Funding, p. 14 | Reported |
